# Supplementary material
Source: PubMed Central journal article supplement (PMC4135925)
Supplement: CVI.00152-14_zcd999095030so1.pdf [file CVI.00152-14_zcd999095030so1.pdf]

**Table S1.** Number of controls and patients with cytokine concentrations below the 5<sup>th</sup>, 10<sup>th</sup> and 20<sup>th</sup> percentile of the whole population after stimulation of peripheral blood mononuclear cells (PBMC) with *Candida albicans* (10<sup>5</sup>/mL).

| Percentile       | IFN- $\gamma$ (n=113) |         |         | IL-17A (n=94) |         |         | IL-22 (n=69) |         |         |
|------------------|-----------------------|---------|---------|---------------|---------|---------|--------------|---------|---------|
|                  | Conc (pg/mL)          | Control | Patient | Conc (pg/mL)  | Control | Patient | Conc (pg/mL) | Control | Patient |
| 5 <sup>th</sup>  | 8                     | 0       | 10      | 42            | 2       | 6       | 78           | 0       | 9       |
| 10 <sup>th</sup> | 18                    | 2       | 18      | 116           | 4       | 13      | 94           | 0       | 12      |
| 20 <sup>th</sup> | 48                    | 10      | 30      | 252           | 8       | 26      | 203          | 3       | 21      |

Abbreviations: conc, concentration

**Table S2.** Inter-test agreement for IFN- $\gamma$ , IL17A and IL-22 production. P-value shown for the comparison between the 5% and 10% cutoff value (middle row) and between the 5% and 20% cutoff value (last row).

| Cutoff | WB                  |     | IFN- $\gamma$        |      | PBMC          |       | IL-22        |      |
|--------|---------------------|-----|----------------------|------|---------------|-------|--------------|------|
|        | IFN- $\gamma$ (n=7) | p   | IFN- $\gamma$ (n=24) | p    | IL-17A (n=19) | p     | IL-22 (n=12) | p    |
| 5%     | 57%                 | ref | 71%                  | ref  | 100%          | ref   | 83%          | ref  |
| 10%    | 43%                 | 1.0 | 67%                  | 0.76 | 79%           | 0.10  | 58%          | 0.37 |
| 20%    | 57%                 | 1.0 | 67%                  | 0.76 | 53%           | 0.001 | 50%          | 0.19 |

Abbreviations: WB, whole blood stimulation, PBMC, peripheral blood mononuclear cell stimulation, ref, reference.

**Table S3.** Proportion of patients with infectious diseases (n=117), stratified according to microbial etiology, for the different cutoff values.

| ID Group                 | 5%          | p <sup>a</sup> | 10%         | p <sup>a</sup> | 20%         | p <sup>a</sup> | p <sup>b</sup> | p <sup>c</sup> |
|--------------------------|-------------|----------------|-------------|----------------|-------------|----------------|----------------|----------------|
| Viral                    | 3/16 (19%)  | 0.06           | 4/16 (25%)  | 0.01           | 4/16 (25%)  | <0.001         | 1.0            | 1.0            |
| Bacterial                | 6/36 (17%)  | 0.01           | 10/36 (28%) | 0.005          | 19/36 (53%) | 0.004          | 0.26           | 0.001          |
| Mycobacterial            | 7/16 (44%)  | 0.72           | 9/16 (56%)  | 0.46           | 10/16 (63%) | 0.08           | 0.48           | 0.29           |
| Fungal,<br>mucocutaneous | 13/33 (39%) | 0.48           | 15/33 (46%) | 0.12           | 21/33 (64%) | 0.03           | 0.62           | 0.04           |
| Fungal, invasive         | 8/16 (50%)  | ref            | 11/16 (69%) | ref            | 15/16 (94%) | ref            | 0.28           | 0.01           |

<sup>a</sup> p: fungal invasive group is the reference (ref) group

<sup>b</sup> p comparison between proportion of affected patients within one ID group using 5% and 10% as cutoff values

<sup>c</sup> p comparison between proportion of affected patients using 5% and 20% within one ID group as cutoff values

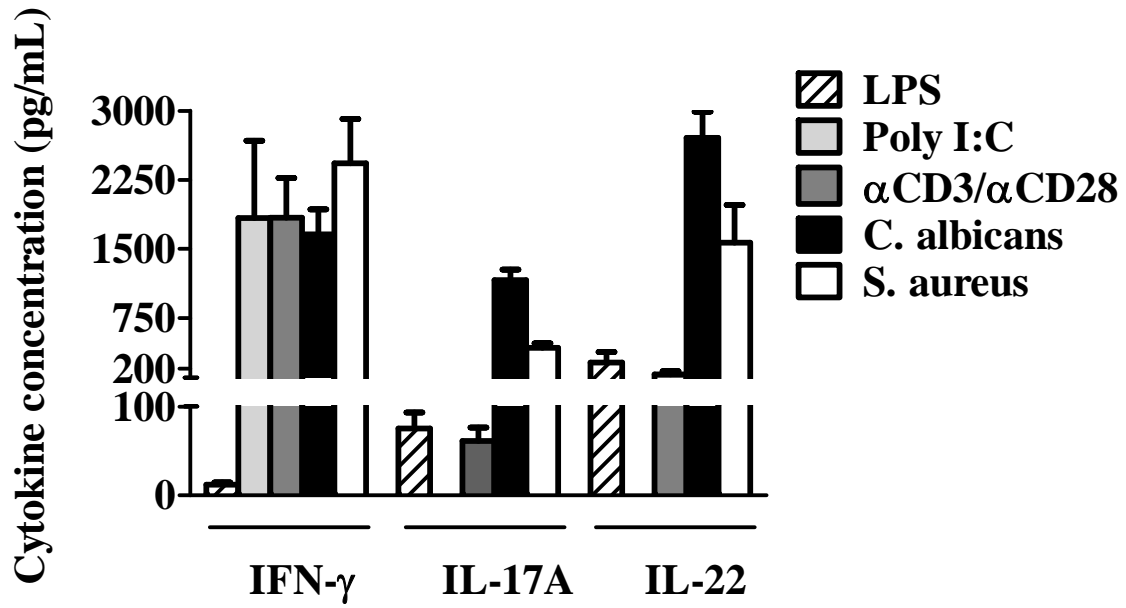

**Figure S1.** Production of IFN- $\gamma$ , IL-17A and IL-22 upon stimulation with LPS, Poly I:C,  $\alpha$ CD3/ $\alpha$ CD28, heat-killed (HK) *C. albicans* conidia, and HK *S. aureus* in healthy volunteers in the PBMC stimulation assay. Bars indicate standard error of the mean.

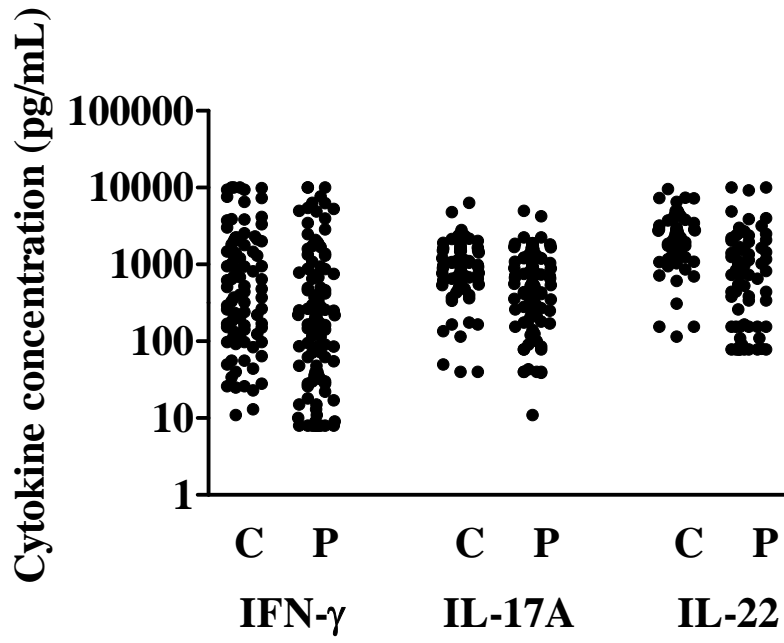

**Figure S2.** IFN- $\gamma$ , IL-17A and IL-22 production by peripheral blood mononuclear cells from healthy volunteers (C) and patients (P) after stimulation with *Candida albicans* ( $10^5$ /mL).

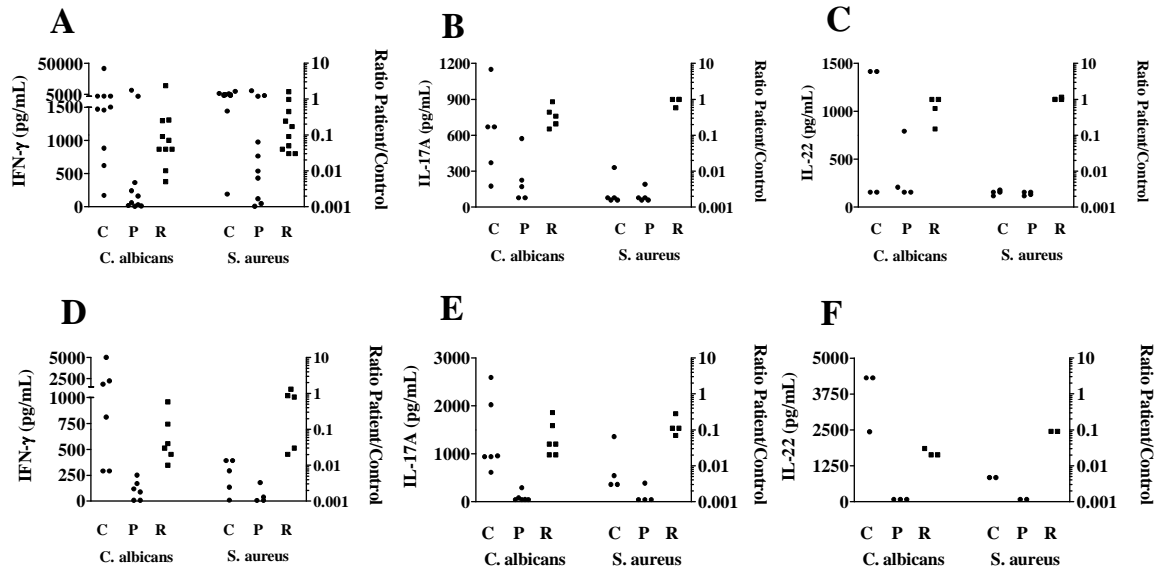

**Figure S3.** IFN- $\gamma$  (whole blood and PBMC stimulation), IL-17A and IL-22 production in patients (column with P) hyper IgE syndrome (panel A-C) and chronic mucocutaneous candidiasis (panel D-F) compared to healthy controls (column with C). The ratio of IFN- $\gamma$ , IL-17A and IL-22 production between patients and healthy volunteers are shown in the column with R.
